# Supplementary material for: Quantitative MRI reveals infrapatellar fat pad changes after running a marathon
Source: PeerJ. 2025 Mar 20;13:e19123. doi: 10.7717/peerj.19123 (PMC11930216; doi:10.7717/peerj.19123)
Supplement: Supplemental Information 1 — The changes in MR quantitative parameters of the infrapatellar fat pad before and after the volunteer marathon [file peerj-13-19123-s001.xlsx]

## Sheet: Sheet1
Serial Number	Gender	Age（years）	Height（cm）	Weight（kg）	BMI（kg/m2 ）	Previous Marathon Time（years）	T1 Mapping(before)/ms					T1 Mapping(after)/ms
1	M	50	169	76	26.6	5	513.2	472.5	484.1	538.7	489.3	487.9	551.3	517.6	471.5	514.1
2	M	49	173	70	23.4	3	489.5	503.7	564.1	472.3	538.6	506.2	574.9	537.3	515.8	529.4
3	M	44	180	80	24.7	4	526.8	465.3	493.7	485.1	499.5	456.3	524.9	498.2	482.1	496.3
4	M	44	168	58	20.5	3	513.8	576.5	555.9	612.2	508	568.3	501.9	534.7	512.5	504.6
5	F	43	168	55	19.5	1	516.8	564.3	547.5	511.9	538.5	552.3	508.9	536.7	499.5	507.6
6	F	42	165	56	20.6	5	503.7	557.1	542.9	540.5	514.1	462.9	541.8	525.3	487.2	484.6
7	M	40	165	62	22.8	3	501.2	443.7	451.1	401.5	502.9	521.8	478.3	503.6	559.1	473.6
8	M	39	183	84	25.1	3	468.3	531.9	495.7	451.2	488.9	548.6	459.3	475.2	441.7	504.6
9	M	38	178	80	25.2	3	505.3	486.9	532.7	501.8	503.3	478.5	505.2	516.9	492.1	506.9
10	M	32	165	64	23.5	3	456.7	502.8	493.5	485.1	475.9	532.4	497.2	481.3	475.7	509.4
11	M	28	170	60	20.8	2	437.9	501.3	455.8	492.2	480.2	491.8	455.3	497.5	464.2	508.8
12	M	25	186	64	18.5	3	595.8	583.2	546.7	559.3	550	462.5	539.1	505.6	496.2	497.4
13	M	23	177	73	23.3	2	427.3	498.7	461.5	459	442	449.2	455.6	450	453.7	450.3
14	M	23	179	74	23.1	2	411	446	469	479	485	395	442	418	419	422
							T2 Mapping(before)/ms					T2Mapping(after)/ms
1	M	50	169	76	26.6	5	53	54	55	53	51	52	50	54	52	51
2	M	49	173	70	23.4	3	59	58	57	56	57	54	56	58	51	50
3	M	44	180	80	24.7	4	39	43	43	43	39	47	50	50	50	52
4	M	44	168	58	20.5	3	64	64	65	63	63	48	50	48	49	52
5	F	43	168	55	19.5	1	64	63	64	61	63	59	58	57	59	54
6	F	42	165	56	20.6	5	70	70	68	67	68	60	58	59	60	59
7	M	40	165	62	22.8	3	47	46	45	44	42	51	49	46	44	41
8	M	39	183	84	25.1	3	51	52	54	55	57	51	53	53	53	52
9	M	38	178	80	25.2	3	47	47	48	50	51	59	57	57	55	55
10	M	32	165	64	23.5	3	43	44	45	46	46	50	51	53	55	56
11	M	28	170	60	20.8	2	51	52	54	56	56	63	63	63	64	68
12	M	25	186	64	18.5	3	58	59	56	55	57	52	51	53	54	50
13	M	23	177	73	23.3	2	46	45	48	48	48	47	46	45	44	45
14	M	23	179	74	23.1	2	55	57	61	57	59	50	49	50	47	49
							FF(before)/%					FF(after)/%
1	M	50	169	76	26.6	5	78.02	74.97	78.76	81.88	77.39	82.19	76.2	74.73	78.38	81.02
2	M	49	173	70	23.4	3	80.06	79.7	80.54	79.22	78.99	82.5	81.14	81.26	81.2	80.93
3	M	44	180	80	24.7	4	79.99	83.93	84.08	82.53	79.63	79.02	81.36	84.74	84.24	83.23
4	M	44	168	58	20.5	3	71.74	72.39	69.59	66.91	69.48	71.42	73.72	76.54	73.69	69.1
5	F	43	168	55	19.5	1	69.48	72.07	72.87	74.37	71.18	73.2	77.04	74.21	75.37	74.47
6	F	42	165	56	20.6	5	81.19	81.77	79.39	78.72	79.26	81.34	85.85	83.6	81.65	79.24
7	M	40	165	62	22.8	3	81.57	80.74	79.64	77.3	80.87	83.05	84.08	79.28	78.53	77.46
8	M	39	183	84	25.1	3	80.48	80.33	81.23	81.28	83.41	79.62	83.84	82.86	81.34	82.1
9	M	38	178	80	25.2	3	75.52	69.89	67.93	70.88	68.61	72.5	70.97	69.87	70.54	70.45
10	M	32	165	64	23.5	3	79.96	78.98	81.15	78.5	74.88	77.3	80.16	80.61	80.66	81.82
11	M	28	170	60	20.8	2	84.37	85.53	86.28	84.47	82.29	85.54	86.69	85.82	83.29	84.34
12	M	25	186	64	18.5	3	72.21	72.49	74.2	75.48	70.79	74.63	74.74	76.73	76.81	74.42
13	M	23	177	73	23.3	2	83.6	82.63	83.61	83.16	80.92	84.07	80.95	81.59	83.98	84.06
14	M	23	179	74	23.1	2	62.12	63.32	57.51	55.69	52.08	58.41	57.44	55.32	54	56.17
							R2*(before)/hz					R2*(after)/hz
1	M	50	169	76	26.6	5	66.43	65.39	71.62	72.11	69.44	63.82	70.76	58.93	55.76	60.19
2	M	49	173	70	23.4	3	67.85	65.45	67.05	67.26	66.87	68.75	66.65	66.55	69.57	67.04
3	M	44	180	80	24.7	4	73.46	68.68	65.7	66.85	69.8	79.1	76.41	67.01	67.33	69.83
4	M	44	168	58	20.5	3	66.33	69.85	78.69	78.38	75.32	82.38	79.53	78.24	76.85	75.35
5	F	43	168	55	19.5	1	84.4	80.47	84.19	82.71	82.43	84.51	81.05	80.14	82.81	86.88
6	F	42	165	56	20.6	5	68.69	67.8	68.88	66.78	73.72	62.36	60.74	61	62.23	66.91
7	M	40	165	62	22.8	3	71.79	72.09	74.8	72.37	80.58	72.57	64.99	66.26	68.01	73.13
8	M	39	183	84	25.1	3	62	60.8	63.66	65.71	62.93	68.24	62.74	61.38	64.84	60.58
9	M	38	178	80	25.2	3	80.78	84.18	86.67	86.67	82.74	85.65	89.55	89.66	86.65	83.44
10	M	32	165	64	23.5	3	70.22	71.02	75.16	76.89	72.56	72.15	73.13	73.15	73.32	76.77
11	M	28	170	60	20.8	2	57.28	57.74	57.57	57.61	58.85	63.16	62.84	63.57	65.94	62.8
12	M	25	186	64	18.5	3	85	82.6	85.18	83.07	82.83	81.48	83.58	80.82	84.24	78.59
13	M	23	177	73	23.3	2	59.8	60.2	57.9	58.6	61.5	59	58.5	55.5	58.2	57
14	M	23	179	74	23.1	2	66.16	67.19	71.85	69.28	68.22	66.89	66.52	67.87	74.64	69.29
							Maximum cross-sectional area（before）/mm2	Maximum cross-sectional area（after）/mm2		volume（before）/mm3	volume（after）/mm3
1	M	50	169	76	26.6	5	726	562		21924.1	20947.6
2	M	49	173	70	23.4	3	674	620		27082.2	22210.5
3	M	44	180	80	24.7	4	558	548		23835.9	19502.2
4	M	44	168	58	20.5	3	475	457		17819.8	16460.2
5	F	43	168	55	19.5	1	462	419		17311.6	12901.9
6	F	42	165	56	20.6	5	449	442		11957.9	13646.7
7	M	40	165	62	22.8	3	424	461		18061.9	15455.5
8	M	39	183	84	25.1	3	681	659		30287.1	23746.9
9	M	38	178	80	25.2	3	471	398		15857.7	14416.4
10	M	32	165	64	23.5	3	590	574		22666.3	19781.2
11	M	28	170	60	20.8	2	508	611		21690.4	18938.1
12	M	25	186	64	18.5	3	440	428		24058.5	22138.1
13	M	23	177	73	23.3	2	538	507		24752.5	19228.1
14	M	23	179	74	23.1	2	562	575		22211.7	22366.9
